# Supplementary material for: Integrated DNA and RNA sequencing reveals early drivers involved in metastasis of gastric cancer
Source: Cell Death Dis. 2022 Apr 21;13(4):392. doi: 10.1038/s41419-022-04838-1 (PMC9023472; doi:10.1038/s41419-022-04838-1)

## **Legends of Supplementary Figures**

### **Supplementary Figure 1. Summary of variants in HMP and LMP group.**

(A, B) Summary of variants in HMP (A) and LMP group (B), including variant classification, variant type (SNP/INS/DEL) and SNV class.

### **Supplementary Figure 2. The roles of candidate metastasis-related genes in migration of GC cells**

(A) Knockdown of RB1CC1, DLL1, PRG4, PCLO, and NBP10 increased, while knockdown of TAF1L, PREX2 and ATXN3 impaired the migration ability of AGS ( $P < 0.05$ ).

(B) Upregulation of KRTAP5-5<sup>WT</sup> increased the migration ability of AGS, while upregulation of KRTAP5-5<sup>A53\_C62del</sup> further increased the migration ability of AGS more.

(C) Upregulation of TP53<sup>WT</sup> impaired the migration ability of MGC-803, while upregulation of TP53<sup>R248W</sup> and TP53<sup>R282W</sup> increased the migration ability of MGC-803.

(D) Upregulation of MADCAM1<sup>WT</sup> impaired the migration ability of MGC-803, while upregulation of MADCAM1<sup>P270Q</sup> and MADCAM1<sup>D242N</sup> increased the migration ability of MGC-803.

(E) CCK8 assays demonstrated that upregulation of MADCAM1<sup>WT</sup> impaired the proliferation ability of MGC-803, while upregulation of MADCAM1<sup>P270Q</sup> and MADCAM1<sup>D242N</sup> increased the proliferation ability of MGC-803.

(F) Clone formation experiments demonstrated that upregulation of MADCAM1<sup>WT</sup> impaired the proliferation ability of MGC-803, while upregulation of MADCAM1<sup>P270Q</sup> and MADCAM1<sup>D242N</sup> increased the proliferation ability of MGC-803.

**Supplementary Figure 3. Transcriptional landscape: Construction of metastasis-related signature to predict prognosis and analysis of immune cell infiltration.**

- (A) The survival of patients with same TNM stage according to riskscore by signature.
- (B) The proportion of HMP, LMP, and M1 group in high riskcore and low riskcore group.
- (C) The level of immune cell infiltration by a list of 66 immune markers containing cell surface markers of different immune cell types.

**Supplementary Figure 4. MADCAM1 associates with macrophages in TCGA cohort.**

- (A, B) The expression of MADCAM1 show a significant negative correlation with the fraction of macrophages and a significant positive correlation with the fraction of lymphocyte.
- (C) The tumors carrying mutational MADCAM1 had more fraction of macrophage infiltration than others.

**Supplementary Figure 5. The expression of some markers in reprogrammed TAMs and GC cell co-cultured with reprogrammed-TAMs.**

- (A) The expression of M2 markers, including ARG1, IL10 and CD163 was higher in MADCAM1<sup>P270Q</sup>-reprogrammed tumor-associated macrophages (TAMs) and MADCAM1<sup>D242N</sup>-reprogrammed-TAMs, but lower or same in MADCAM1<sup>WT</sup>-reprogrammed-TAMs compared with the control.
- (B) Immunofluorescence staining of CD163 and morphology observed in MADCAM1<sup>WT</sup>, MADCAM1<sup>MUT</sup> and control reprogrammed TAMs. The mean intensity of CD163 was

normalized to nuclear DAPI staining and was quantified by ImageJ software.

- (C) The expression of M2 markers, including ARG1 and CD163 was higher in MADCAM1<sup>P270Q</sup>-reprogrammed TAMs and MADCAM1<sup>D242N</sup>-reprogrammed-TAMs, which could be reversed by AKT inhibitor.
- (D) Blockading CCL2 by anti-CCL2 antibody could reversed the increased M2 markers in MADCAM1<sup>D242N</sup> reprogrammed-TAM.
- (E) The GC cells co-cultured with MADCAM1<sup>P270Q</sup>-reprogrammed or MADCAM1<sup>D242N</sup>-reprogrammed-TAMs showed increased migration ability compared with control, which could be reversed by AKT inhibitor.
- (F) The expression of CD274 (PD-L1), as well as some EMT markers (SLUG, MMP9), OCT4 and chemokines (IL4, IL13), were up-regulate in GC cell co-cultured with MADCAM1<sup>P270Q</sup>-reprogrammed or MADCAM1<sup>D242N</sup>-reprogrammed-TAMs, compared with GC cell co-cultured with MADCAM1<sup>WT</sup>-reprogrammed-TAMs

### **Supplementary Figure 1**

**A**

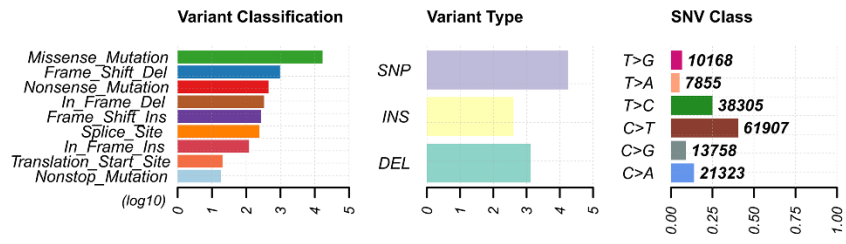

**B**

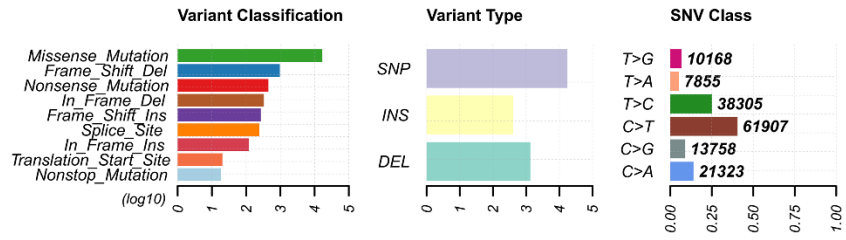

Supplementary Figure 2

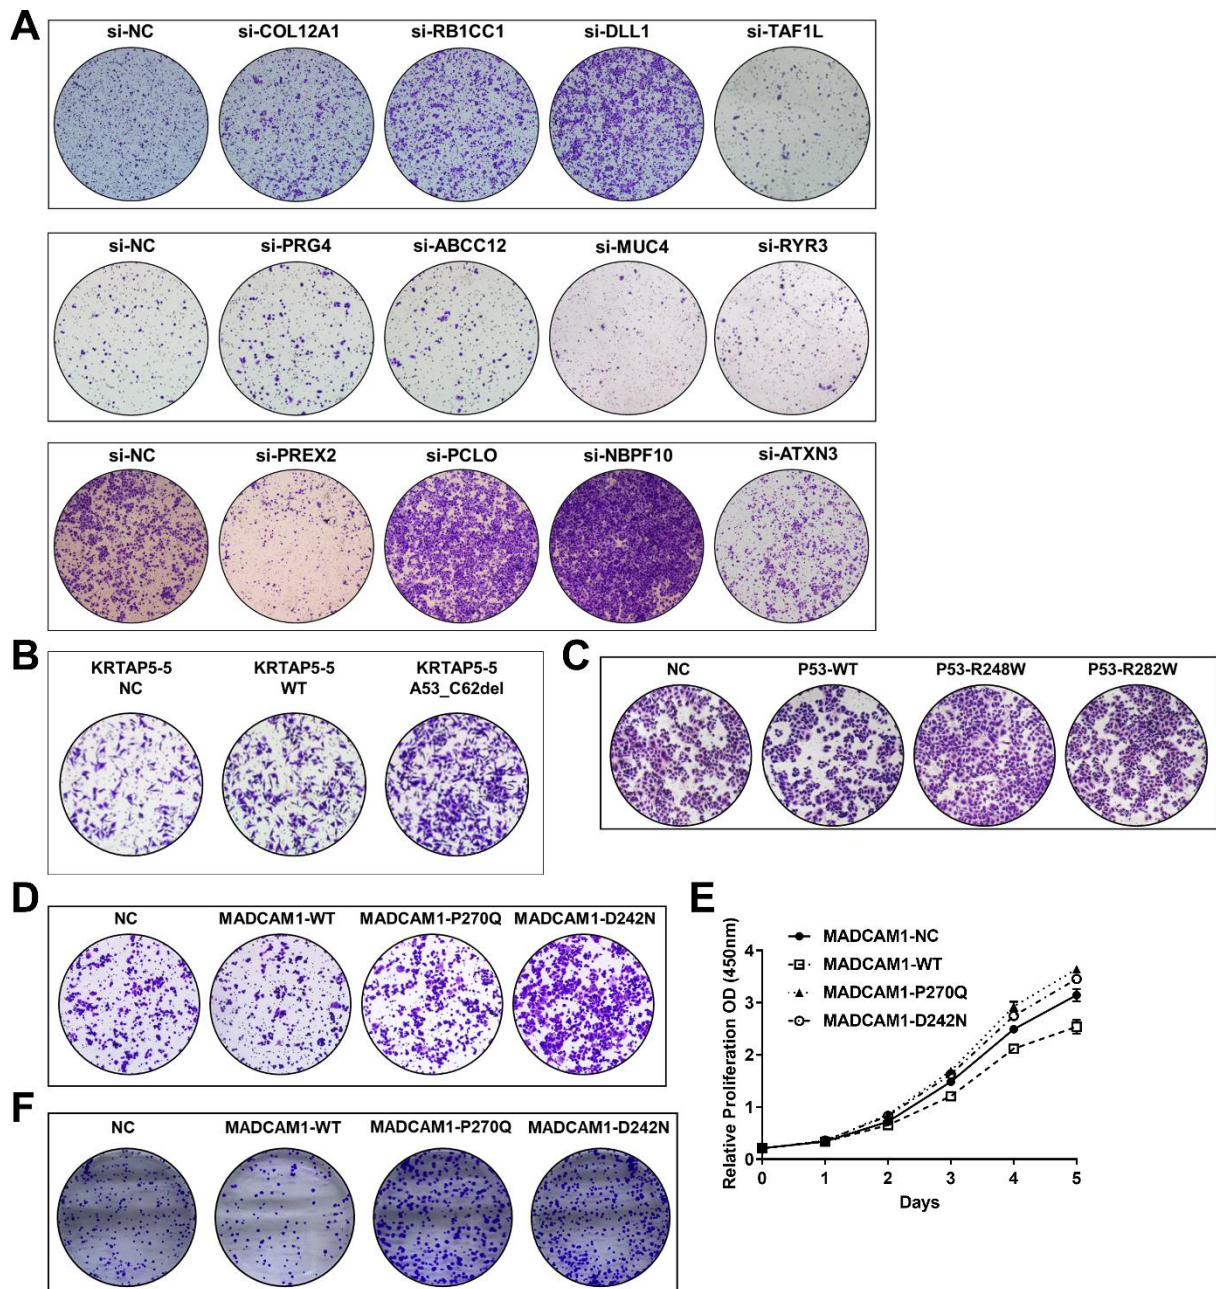



Supplementary Figure 4

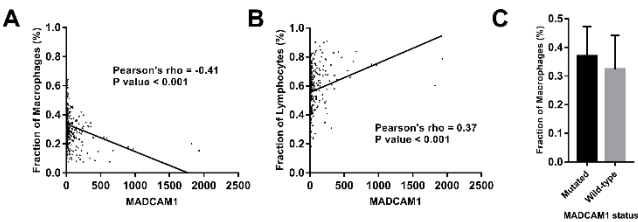

Supplementary Figure 5

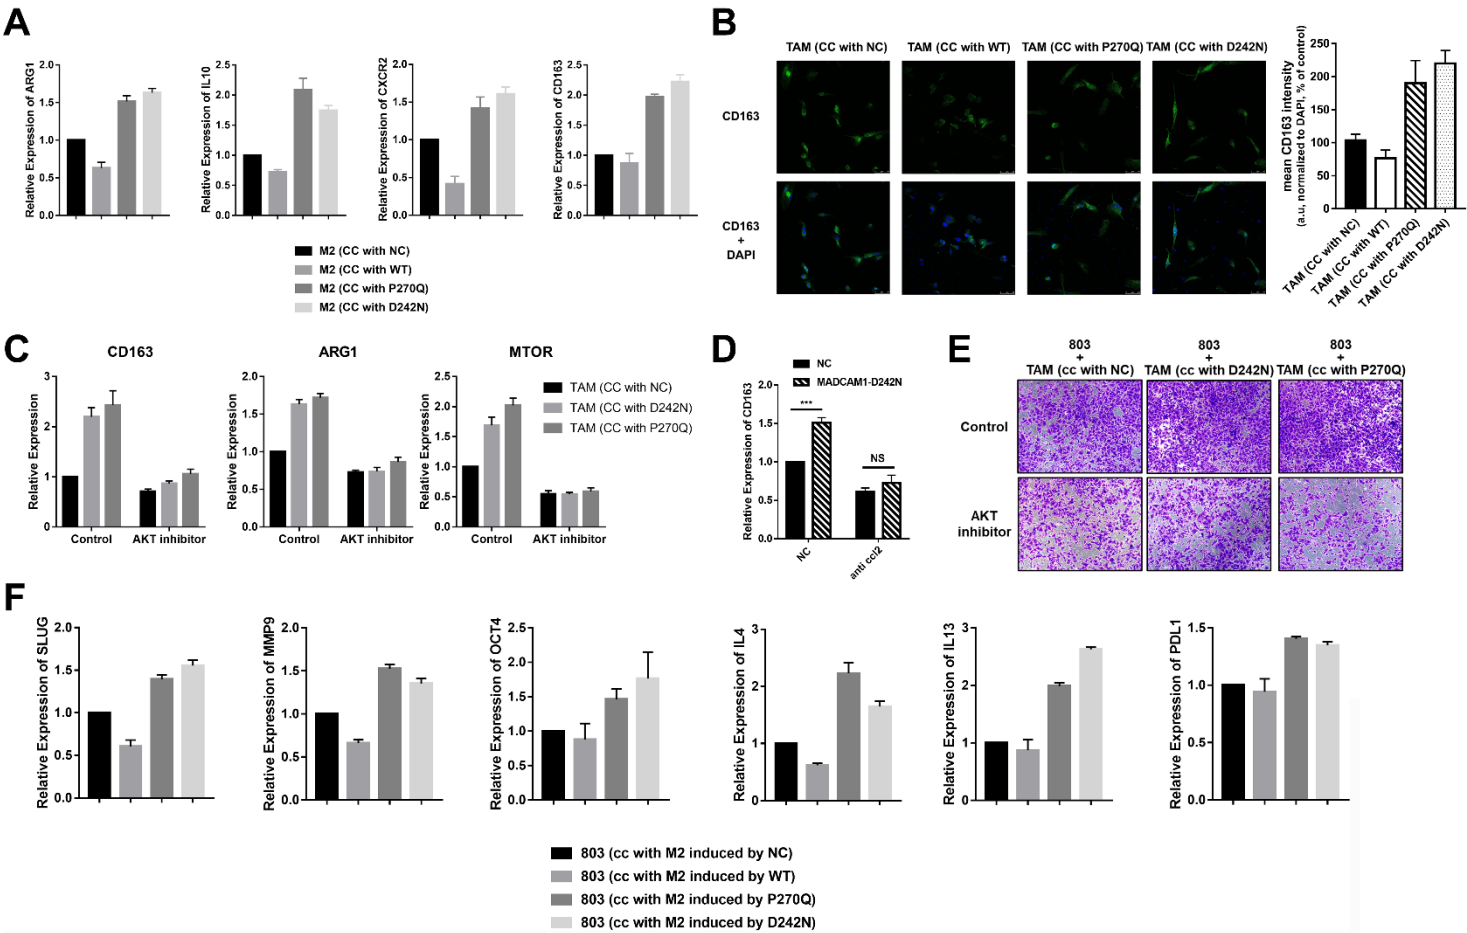

Supplement: Supplementary file 3 — Supplementary Figures 1-5 [file 41419_2022_4838_MOESM3_ESM.pdf]
