# Supplementary material for: Integrated DNA and RNA sequencing reveals early drivers involved in metastasis of gastric cancer
Source: PubMed Central journal article supplement (PMC9023472; doi:10.1038/s41419-022-04838-1), 2022-04-21

**Supplementary Figures 6. Uncropped original western blots images used in the article.**

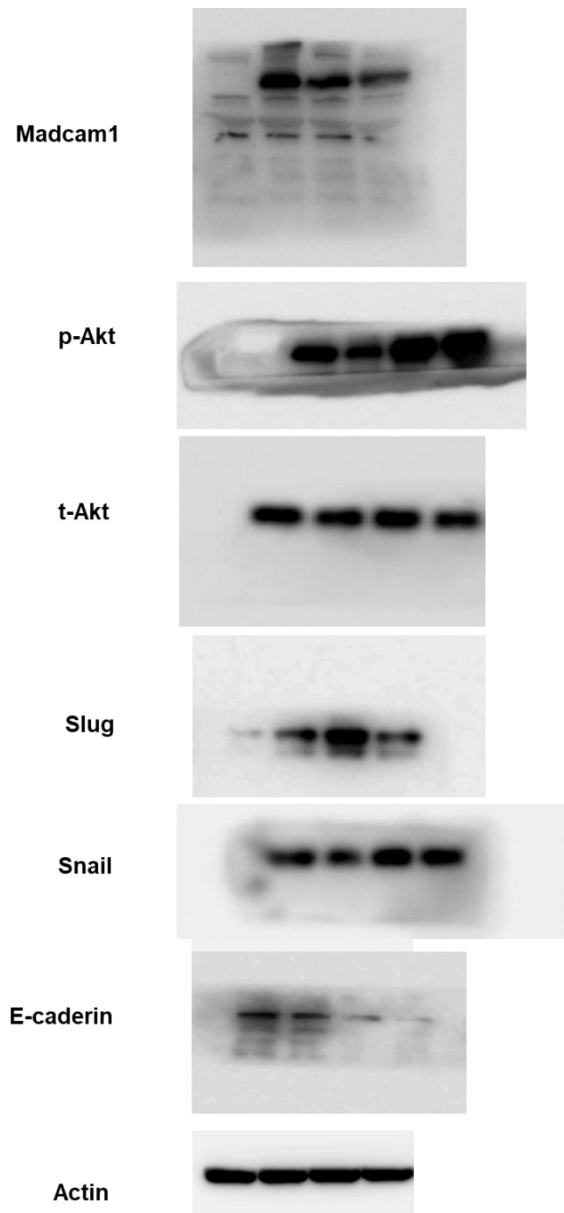

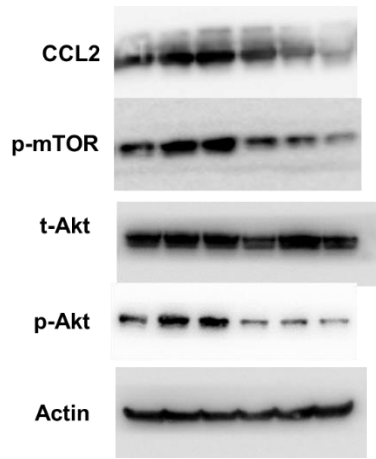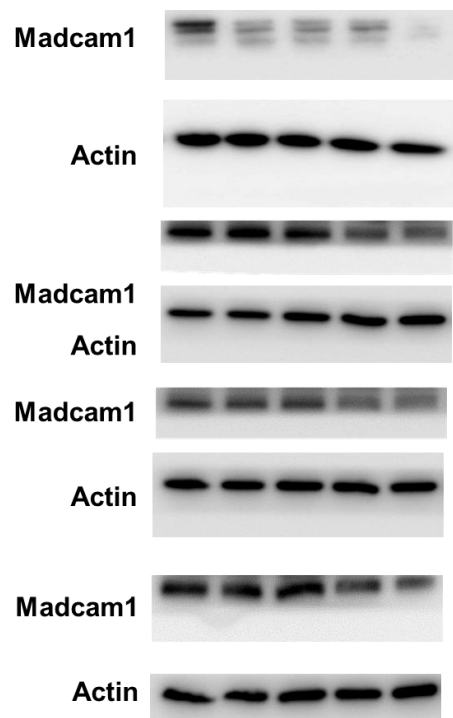

Supplement: 41419_2022_4838_MOESM2_ESM.pdf [file 41419_2022_4838_MOESM2_ESM.pdf]
